# Supplementary material
Source: PubMed Central journal article supplement (PMC6640749)
Supplement: ao6b00209_si_001.pdf [file ao6b00209_si_001.pdf]

# **In-situ surface engineering of mesoporous silica generates interfacial activity and catalytic acceleration effect**

*Fengwei Zhang<sup>a\*</sup>, Juan Li<sup>a</sup>, Xincheng Li<sup>b</sup>, Mengqi Yang<sup>b</sup>, Hengquan Yang<sup>a,b\*</sup> and*

*Xian-Ming Zhang<sup>a\*</sup>*

<sup>a</sup> Institute of crystalline materials, Shanxi University, Taiyuan 030006, P. R. China

<sup>b</sup> School of Chemistry and Chemical Engineering, Shanxi University, Taiyuan

030006, P. R. China

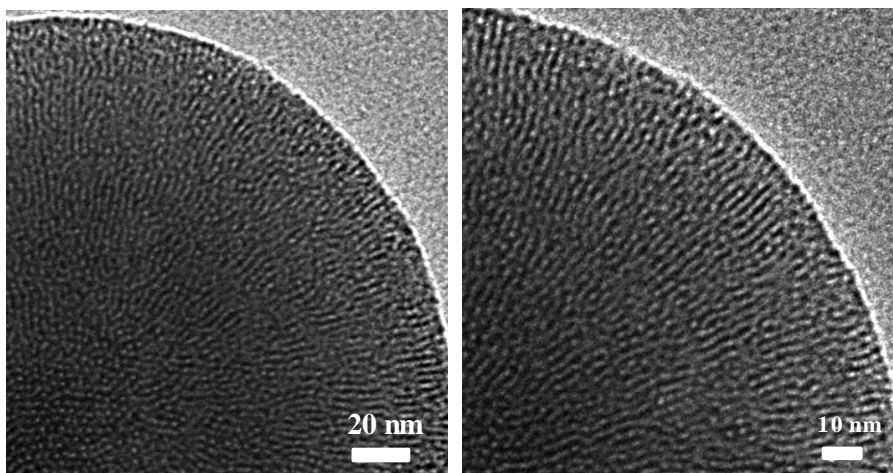

**Figure S1.** The HRTEM image of MS-PAP-20 microsphere.

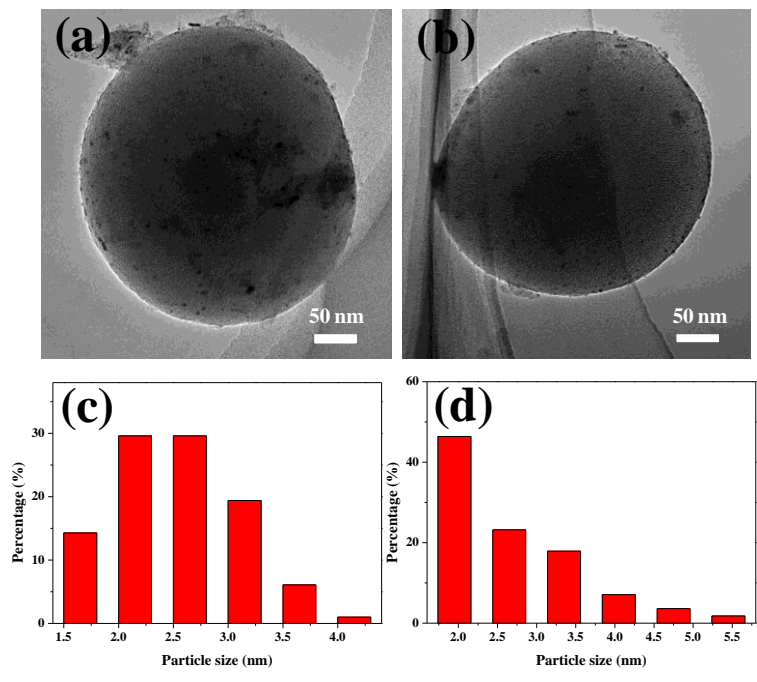

**Figure S2.** The TEM images of (a) Pd/MS, (b) Pd/MS-PAP-20, (c) and (d) the corresponding size distribution of Pd NPs.

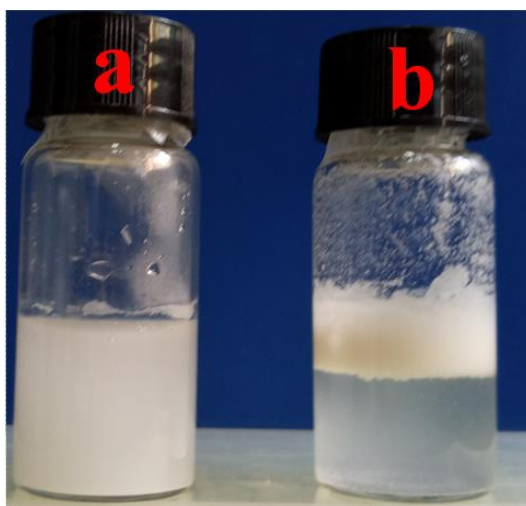

**Figure S3.** (a) The hydrophilic MS microsphere and (b) the relatively hydrophobic MS-PAP-20 microsphere in deionized water.

**Table S1.** Results of N<sub>2</sub> adsorption-desorption of the prepared mesoporous materials.

| Sample       | BET (m <sup>2</sup> ·g <sup>-1</sup> ) | Pore volume (cm <sup>3</sup> ·g <sup>-1</sup> ) | Pore size (nm) |
|--------------|----------------------------------------|-------------------------------------------------|----------------|
| MS           | 882                                    | 0.625                                           | 3.2            |
| Pd/MS        | 715                                    | 0.599                                           | 3.1            |
| MS-PAP-20    | 593                                    | 0.402                                           | 2.8            |
| Pd/MS-PAP-20 | 244                                    | 0.264                                           | 2.5            |
